# Supplementary material for: Timing of norepinephrine initiation in patients with septic shock: a systematic review and meta-analysis
Source: Springer Nature journal article supplement (doi:10.1186/s13054-020-03204-x), 2020-08-06
Supplement: MOESM1 [file 18254642]

Permpikul 2019

Elbouhy 2019

|                                                                                     |                                                                                     |                                                                                     |                                                                                      |                                                                                       |                                                                                       |                                                                                       |
|-------------------------------------------------------------------------------------|-------------------------------------------------------------------------------------|-------------------------------------------------------------------------------------|--------------------------------------------------------------------------------------|---------------------------------------------------------------------------------------|---------------------------------------------------------------------------------------|---------------------------------------------------------------------------------------|
|  |  |  |  |  |  |  |
|  |  |  |  |  |  |  |

Random sequence generation (selection bias)

Allocation concealment (selection bias)

Blinding of participants and personnel (performance bias)

Blinding of outcome assessment (detection bias)

Incomplete outcome data (attrition bias)

Selective reporting (reporting bias)

Other bias
