# Supplementary material for: Timing of norepinephrine initiation in patients with septic shock: a systematic review and meta-analysis
Source: Springer Nature journal article supplement (doi:10.1186/s13054-020-03204-x), 2020-08-06

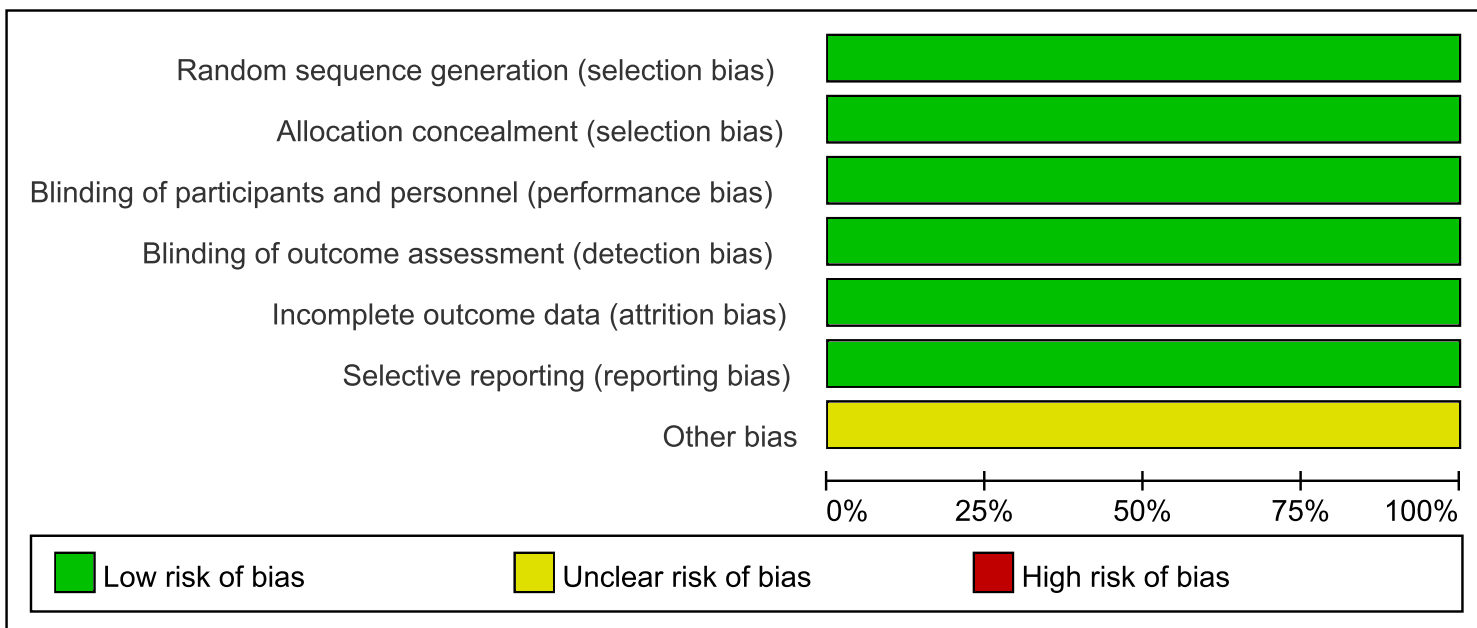

Supplement: MOESM2 [file 18254642]
